# Supplementary material for: Selective Targeting of a Novel Vasodilator to the Uterine Vasculature to Treat Impaired Uteroplacental Perfusion in Pregnancy
Source: PubMed Central journal article supplement (PMC5667343; doi:10.7150/thno.19678), 2017-08-29
Supplement: thnov07p3715s1.pdf [file thnov07p3715s1.pdf]

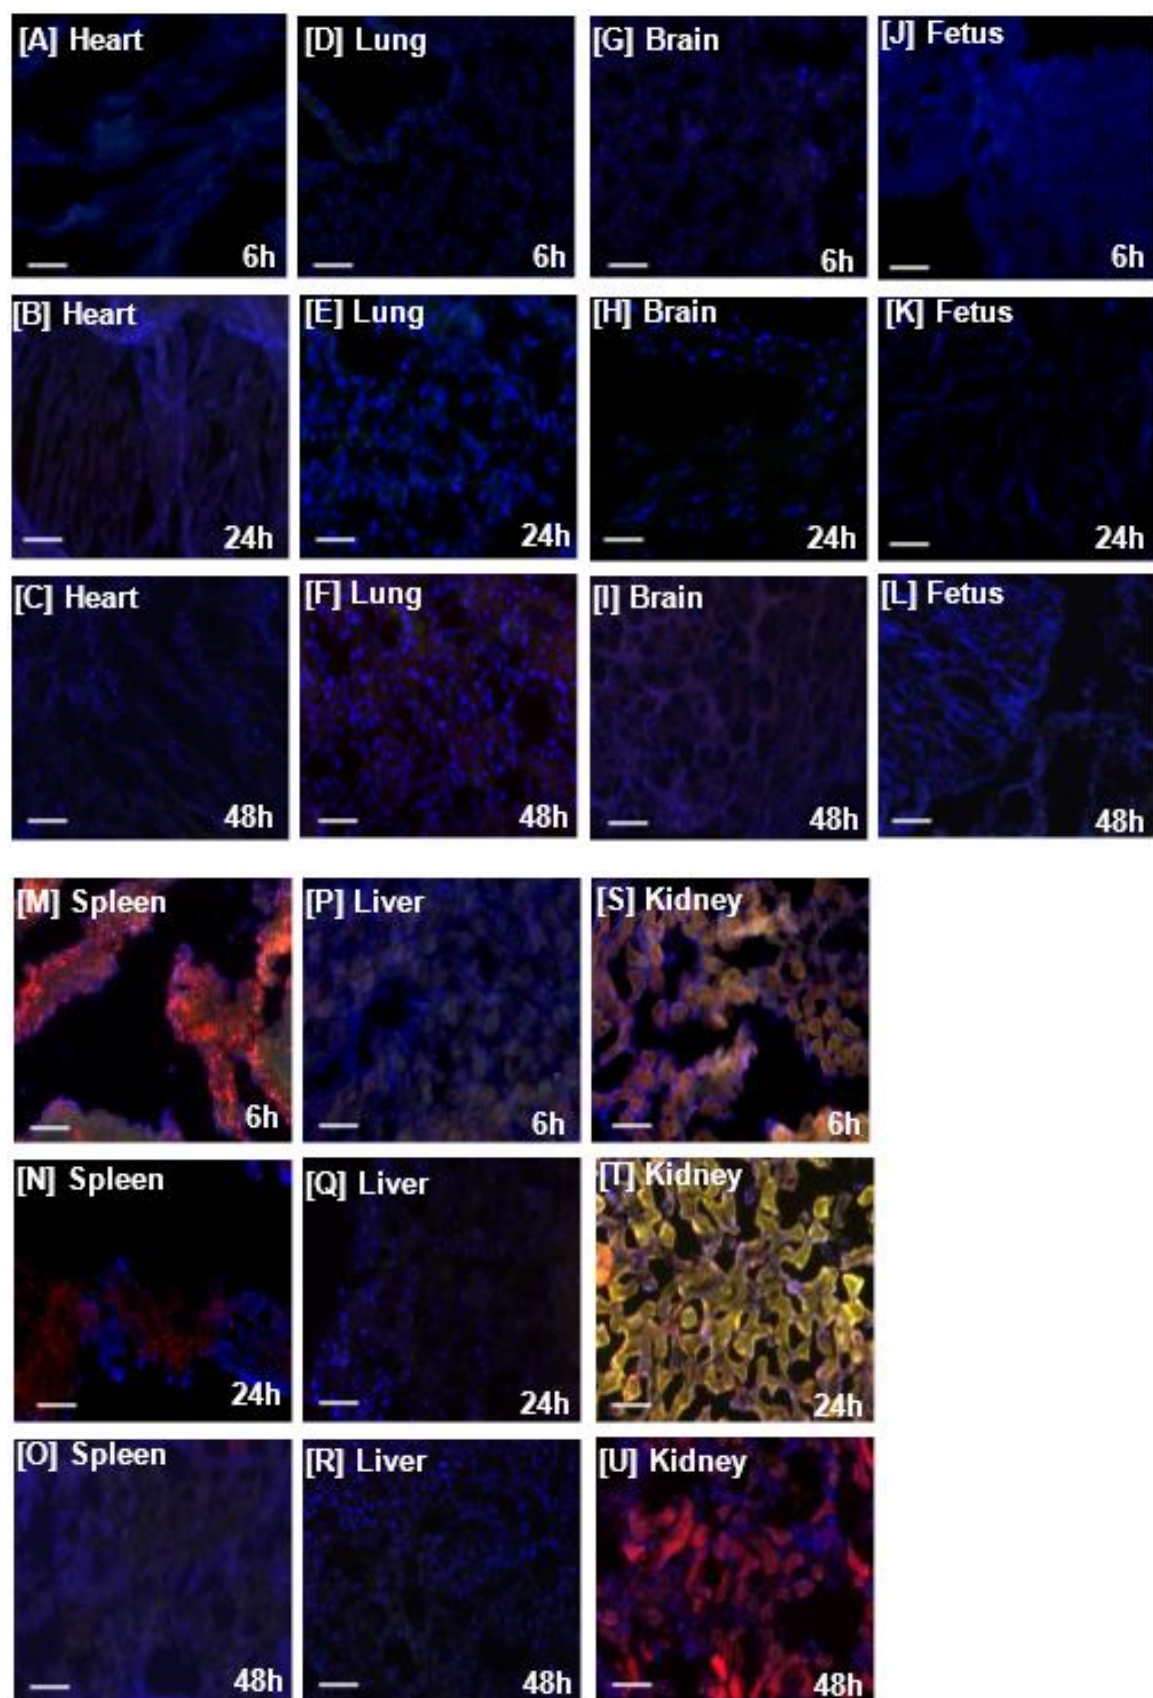

**Supplementary Figure 1: Identification of the placental-homing peptide NKGLRNK**

**[A-U]** Maternal organs and fetuses from pregnant C57BL/6J mice collected at E18.5, following tail vein injection of Rh-CNKGLRNK (red)-decorated liposomes composed of NBD-labelled lipids (green), 6, 24 or 48h prior to tissue harvest. Cardiac perfusion was performed to remove unbound peptide; organs were removed and assessed by fluorescence microscopy. Blue, DAPI (nuclei). Scale bar = 50  $\mu$ m. Tissues from n = 3 mice per treatment group were examined. Representative images are shown.

### [A] Fetal weight

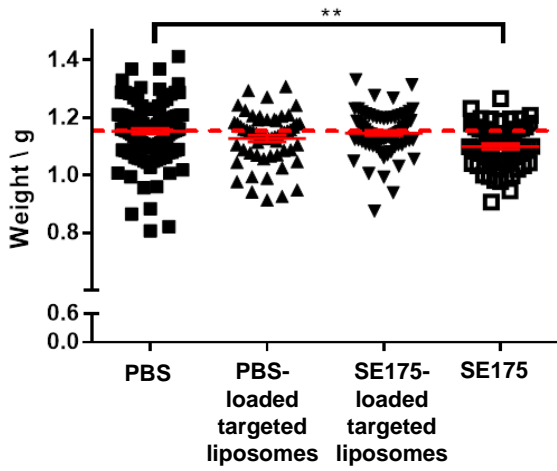

### [B] Fetal weight distribution

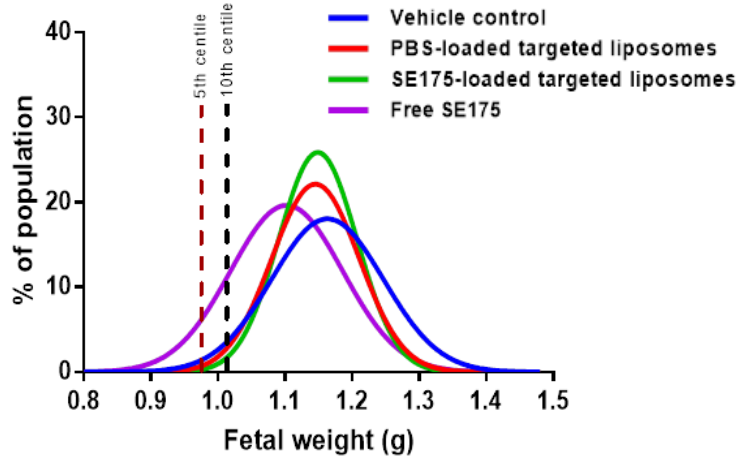

### [C] Placental weight

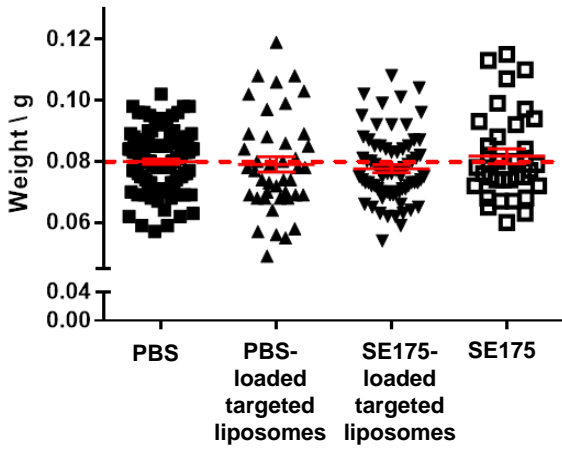

### [D] Fetal:placental weight ratio

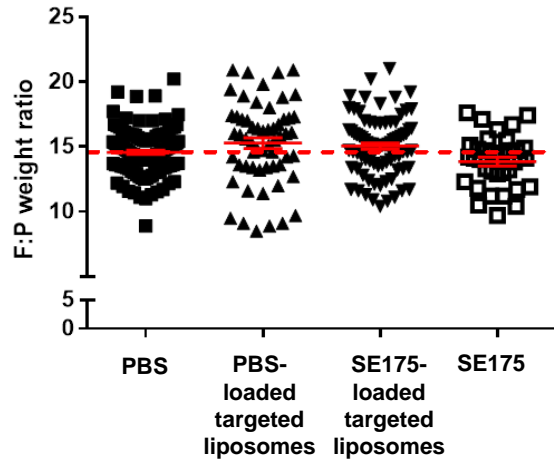

### [E] Litter size

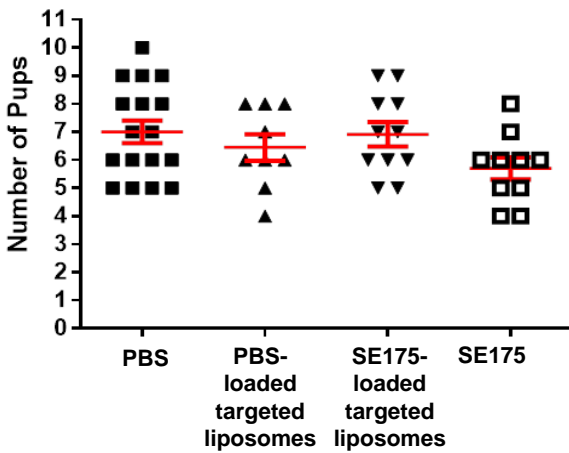

### [F] Percent of resorptions per litter

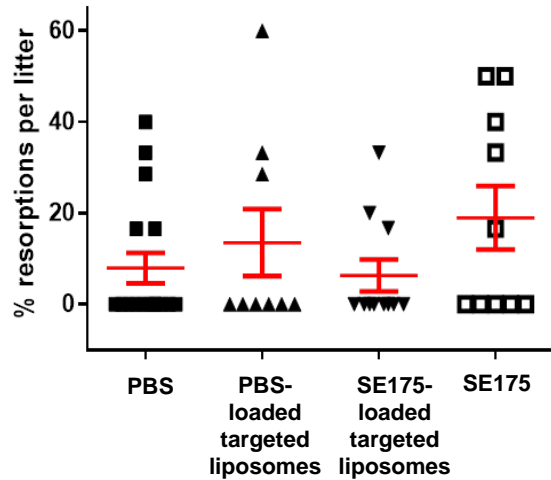

## Supplementary Figure 2: Targeted delivery of SE175 has no effect on fetal or placental weight in C57BL/6J mice

C57BL/6J mice (N = dams, n = fetuses) were intravenously injected with 100  $\mu$ L of PBS (N = 17, n = 115; closed black square), CNKGLRNK-decorated liposomes containing PBS (N = 9, n = 58; upward facing black triangle), CNKGLRNK-decorated liposomes containing SE175 (N = 11, n = 72; downward facing black triangle) or free SE175 (N = 10, n = 56; open black square). Horizontal red dashed line represents vehicle control mean. **[A]** Fetal weights, **[B]** curve fits to fetal weight distributions, **[C]** placental weights, **[D]** fetal:placental weight ratio (F:P), **[E]** litter size, **[F]** percent of resorptions per litter. Data points represent individual fetuses or placentas; mean  $\pm$  SEM. Means were compared using one-way ANOVA with Dunnett's *post hoc* test. \*\*P<0.001.



**Supplementary Figure 3: Targeted delivery of SE175 does not alter litter size or resorption rate in eNOS<sup>-/-</sup> mice**

eNOS<sup>-/-</sup> (N = dams, n = fetuses) were intravenously injected with 100  $\mu$ L of PBS (N = 14, n = 113; closed black square), CNKGLRNK-decorated liposomes containing PBS (N = 9, n = 67; upward facing black triangle), CNKGLRNK-decorated liposomes containing SE175 (N = 10, n = 68; downward facing black triangle) or free SE175 (N = 8, n = 57; open black square). Data from PBS-treated C57BL/6J mice are shown for comparison (N = 17, n = 115; closed black circle). **[A]** Litter size **[B]** Percent of resorptions per litter. Mean  $\pm$  SEM.
